# Supplementary material for: Functional MoS2nanosheets inhibit melanogenesis to enhance UVB/X-ray induced damage
Source: Royal Society of Chemistry journal article supplement (doi:10.1039/c9tb00419j), 2019-01-01
Supplement: c9tb00419j1.pdf [file c9tb00419j1.pdf]

**Supporting Information for:**

**Functional MoS<sub>2</sub> nanosheets inhibit melanogenesis to enhance UVB/X-ray  
induced damage**

Ling Jiang<sup>a, #</sup>, Yanyan Xu<sup>b, #</sup>, Pei Zhang<sup>b</sup>, Yi Zhang<sup>c, d</sup>, Huimin Li<sup>b</sup>, Jing Chen<sup>a, \*</sup>,  
Song Liu<sup>b, \*</sup>, Qinghai Zeng<sup>a, \*</sup>

a Department of Dermatology, Third Xiangya Hospital, Central South University,  
Changsha, 410013, China

b Institute of Chemical Biology and Nanomedicine (ICBN), State Key Laboratory of  
Chemo/Biosensing and Chemometrics, College of Biology, College of Chemistry and  
Chemical Engineering, Hunan University, Changsha, 410082, China

c Hunan Key Lab of Mineral Materials and Application, Central South University,  
Changsha 410083, China

d School of Minerals Processing and Bioengineering, Central South University,  
Changsha 410083, China

# These authors contributed equally to the work

\*corresponding authors: [271594943@qq.com](mailto:271594943@qq.com), [43700351@qq.com](mailto:43700351@qq.com),  
[liusong@hnu.edu.cn](mailto:liusong@hnu.edu.cn)

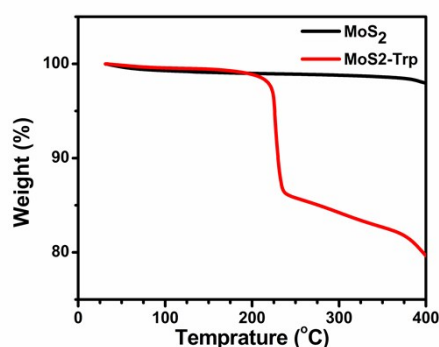

**Fig. S1.** Thermogravimetric analysis (TGA) curve of MoS<sub>2</sub>-Trp nanosheets. The weight loss of 3% is due to water below 100 °C. The weight loss of ~22 % is mainly attributed to the thermal decomposition of Trp into carbon in the range of 200-400 °C.

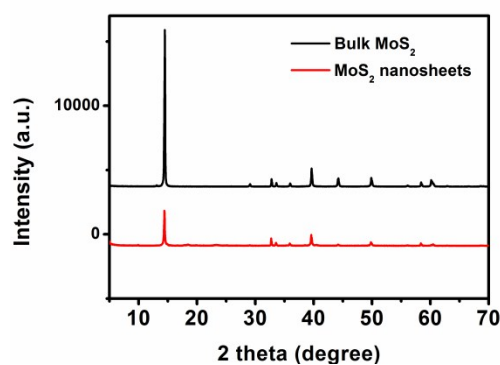

**Fig. S2.** XRD patterns of powders of bulk MoS<sub>2</sub> (black) and exfoliated MoS<sub>2</sub>-Trp nanosheets (red). It shows that the nanosheets remain the crystalline nature after exfoliation.

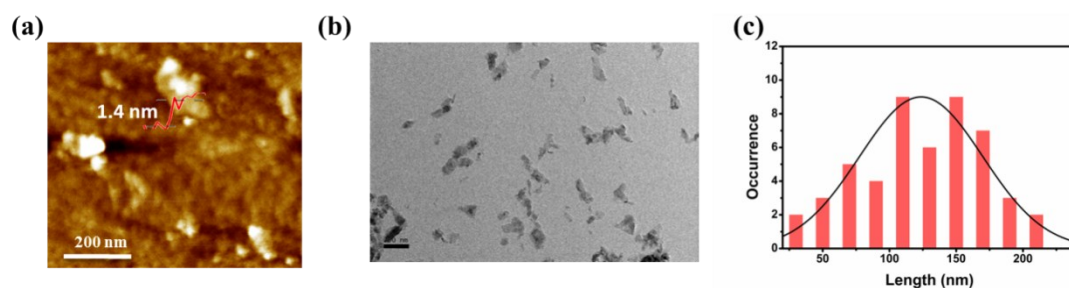

**Fig. S3.** (a) AFM image of few-layers MoS<sub>2</sub>-Trp with the thickness of 1.4 nm-4 nm. TEM image of MoS<sub>2</sub>-Trp in figure (b) and (c) the dimensional chart of MoS<sub>2</sub>-Trp from TEM image. These results indicate the size distribution of MoS<sub>2</sub>-Trp from the 50 samples was ranged from 31.757 nm to 210.888 nm. And the mean diameter of MoS<sub>2</sub>-Trp is 124.89 nm which is consistent with 123.4 nm from AFM test. Compared with the data from DLS, the deviation may be due to the uneven size of the material.

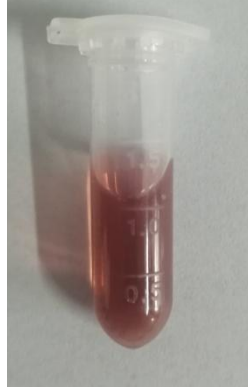

**Fig. S4** Add 0.5 mL MoS<sub>2</sub>-Trp-PEG to 1.5mL serum and it still evenly dispersed after 2 days.

**Table S1.** The sequences of all primers used in this study

| Target gene | Forward primer (5'-3') | Reverse primer (5' -3') |
|-------------|------------------------|-------------------------|
| MITF        | AATGGCAAATACGTTACCCG   | AAGGTTGGCTGGACAGGAGT    |
| TYR         | AGCCCAGCATCCTTCTTCTC   | AGTGGTCCCTCAGGTGTTCC    |
| DCT         | AAATAATGAGAAACTGCCAACC | CGTCTGCTTTATCAAACCTT    |
| RAB27a      | ACGCTATGGGTTTCCTGCTT   | CCTCTTTCACTGCCCTCTGG    |
| FSCN1       | ATTGGCTGCCGCAAGGTCAC   | CCCGTGGAGTCTTTGATGTTGT  |
| MYO5A       | AATCTCCGAGTTCGCTTCAT   | ATCCCTTGCCATTTGCTTGT    |

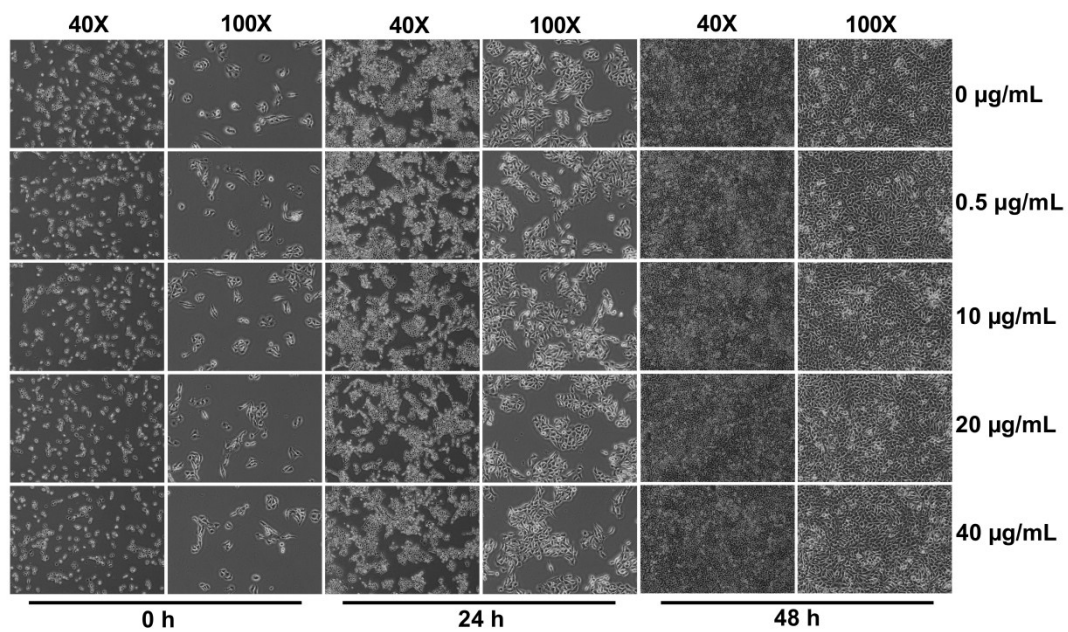

**Fig. S5.** Morphological changes in B16F10 cells induced by MoS<sub>2</sub>-Trp-PEG, which was seen via inverted microscopy. Magnification 40× and 100×.

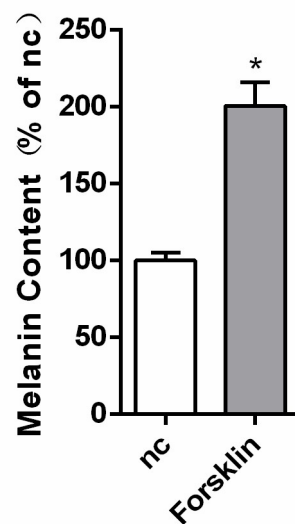

**Fig. S6.** Melanin content of Forsklin stimulated B16F10 cells were expressed as percentages relative to nc group (\* $P < 0.05$ ). nc: normal cells.

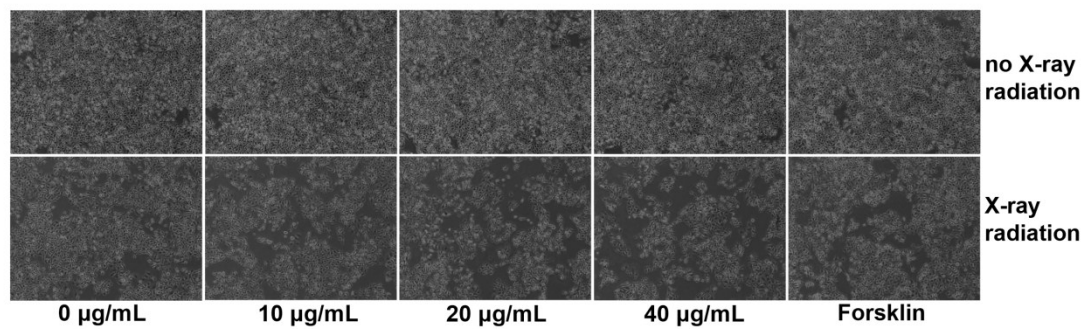

**Fig. S7.** MoS<sub>2</sub>-Trp-PEG increases X-ray-induced cells damage. Cell numbers changes in B16F10 cells induced by MoS<sub>2</sub>-Trp-PEG alone or combined with X-ray were seen by inverted microscopy. Magnification 40×.
